# Supplementary material for: Real-Time Survey of Vaccine Safety of the mRNA-1273 SARS-CoV-2 Vaccine in Workplace Vaccination at Keio University
Source: MDPI journal article supplement (doi:10.3390/vaccines10091461), 2022-09-03
Supplement: s1 [file s1]

Table S1. P-values of Fisher's Exact Tests by gender group comparison

|                 |                     | Day 0 |        |       | Day 1 |        |       | Day 3 |        |       | Day 7 |        |       |
|-----------------|---------------------|-------|--------|-------|-------|--------|-------|-------|--------|-------|-------|--------|-------|
| Dose            |                     | First | Second | Third |
| Any side effect |                     | .005  | .159   | .658  | <.001 | .557   | 1.000 | .882  | .084   | .166  | .004  | .018   | 1.000 |
| Local           | Injection-site pain | .001  | .851   | .658  | <.001 | .121   | 1.000 | .874  | .140   | .137  | .254  | .553   | 1.000 |
|                 | Localized warmth    | .003  | .456   | .746  | .028  | .044   | .320  | 1.000 | 1.000  | .635  | 1.000 | 1.000  | -     |
|                 | Exanthema           | 1.000 | .613   | -     | 1.000 | 1.000  | -     | -     | .517   | -     | 1.000 | 1.000  | -     |
|                 | Erythema            | 1.000 | .022   | -     | .281  | .006   | 1.000 | .085  | .216   | 1.000 | .259  | 1.000  | -     |
|                 | Swelling            | .079  | .194   | 1.000 | .008  | .020   | 1.000 | .532  | .039   | .635  | .060  | 1.000  | -     |
|                 | Itchiness           | -     | 1.000  | -     | 1.000 | .215   | -     | .050  | .086   | .635  | .208  | .159   | .499  |
|                 | Red eye             | .427  | 1.000  | -     | 1.000 | 1.000  | 1.000 | -     | -      | -     | -     | -      | -     |
| Systemic        | Malaise             | .036  | .660   | .518  | .002  | .859   | 1.000 | .797  | .189   | .627  | 1.000 | .653   | -     |
|                 | Fever               | .390  | .303   | .158  | .002  | .815   | .681  | .761  | .713   | 1.000 | -     | .553   | -     |
|                 | Fatigue             | 1.000 | .861   | .711  | .511  | .870   | .506  | 1.000 | .161   | 1.000 | 1.000 | .535   | -     |
|                 | Myalgia             | .750  | .119   | 1.000 | .763  | .268   | 1.000 | 1.000 | 1.000  | .506  | 1.000 | 1.000  | 1.000 |
|                 | Arthralgia          | .440  | .182   | .711  | .688  | .538   | 1.000 | 1.000 | 1.000  | 1.000 | -     | 1.000  | -     |
|                 | Nausea/Vomiting     | .737  | 1.000  | 1.000 | .490  | .215   | .509  | 1.000 | .276   | -     | -     | -      | -     |
|                 | Diarrhea            | .427  | 1.000  | -     | 1.000 | .051   | -     | .165  | 1.000  | -     | -     | -      | -     |
|                 | Chills              | 1.000 | .311   | .690  | .207  | .418   | 1.000 | .514  | 1.000  | -     | -     | -      | -     |
|                 | Headache            | .684  | .422   | .633  | .017  | .216   | .744  | .530  | .306   | -     | .633  | .159   | -     |
|                 | Rash                | -     | .350   | -     | 1.000 | 1.000  | -     | -     | 1.000  | -     | -     | 1.000  | -     |

Table S2. P-values of Fisher's Exact Tests by age group comparison

Young group 18 to &lt;30 yr vs. middle-aged group ≥30 yr

|                 |                     | Day 0 |        |       | Day 1 |        |       | Day 3 |        |       | Day 7 |        |       |
|-----------------|---------------------|-------|--------|-------|-------|--------|-------|-------|--------|-------|-------|--------|-------|
| Dose            |                     | First | Second | Third |
| Any side effect |                     | .565  | .384   | .655  | .039  | .552   | 1.000 | .421  | .376   | .273  | 1.000 | .563   | .056  |
| Local           | Injection-site pain | .227  | .435   | .655  | .023  | .103   | 1.000 | .732  | .455   | .709  | 1.000 | .552   | .407  |
|                 | Localized warmth    | .033  | .349   | .726  | .002  | .630   | 1.000 | .676  | 1.000  | 1.000 | 1.000 | 1.000  | -     |
|                 | Exanthema           | 1.000 | 1.000  | -     | 1.000 | .552   | -     | -     | .543   | -     | 1.000 | 1.000  | -     |
|                 | Erythema            | .209  | .598   | -     | .135  | 1.000  | .316  | .717  | .135   | 1.000 | .718  | .354   | -     |
|                 | Swelling            | .477  | .822   | 1.000 | 1.000 | .840   | .577  | .475  | .294   | .575  | .166  | .354   | -     |
|                 | Itchiness           | -     | .343   | -     | .625  | .524   | -     | .034  | .183   | .082  | .178  | .053   | .157  |
|                 | Red eye             | 1.000 | 1.000  | -     | 1.000 | 1.000  | 1.000 | -     | -      | -     | -     | -      | -     |
| Systemic        | Malaise             | .847  | .014   | .300  | .048  | 1.000  | .393  | 1.000 | 1.000  | .297  | 1.000 | .345   | -     |
|                 | Fever               | .093  | .090   | .128  | .002  | 1.000  | 1.000 | .184  | .713   | .314  | -     | .552   | -     |
|                 | Fatigue             | .227  | .063   | .041  | .084  | .304   | .725  | .675  | .770   | 1.000 | 1.000 | .123   | -     |
|                 | Myalgia             | .705  | .474   | .159  | .863  | .410   | .268  | 1.000 | .496   | 1.000 | -     | .285   | .407  |
|                 | Arthralgia          | 1.000 | .320   | .247  | .033  | .632   | .296  | 1.000 | 1.000  | .314  | .329  | 1.000  | -     |
|                 | Nausea/Vomiting     | .212  | .424   | 1.000 | .689  | .755   | .094  | 1.000 | 1.000  | -     | -     | -      | -     |
|                 | Diarrhea            | 1.000 | .557   | -     | 1.000 | 1.000  | -     | .081  | .348   | -     | -     | -      | -     |
|                 | Chills              | .350  | .013   | .651  | .807  | .737   | .268  | 1.000 | 1.000  | -     | -     | -      | -     |
|                 | Headache            | .223  | .090   | .298  | <.001 | .260   | .486  | .732  | .405   | -     | 1.000 | .655   | -     |
|                 | Rash                | -     | .296   | -     | 1.000 | 1.000  | -     | -     | 1.000  | -     | -     | 1.000  | -     |

Table S3. Comparison of reported rates in other observational studies and a meta-analysis of mRNA-1273 vaccine.

AEFIs with rates <1% are not listed for other studies.

\* The rates of the present study indicate the maximum rates reported among three doses.

† The rates of meta-analysis indicate the minimum and maximum rates in mRNA-1273 vaccine clinical trials.

[1] Ito S. Interim analysis of health diary (17), COVID-19 Vaccine Early Phase Intensive Survey (cohort study) (in Japanese). The 73rd Immunization and Vaccine Committee Adverse reaction Assessment Subcommittee, R3 23rd Pharmaceutical Affairs Committee Drug Safety Countermeasure Subcommittee, Tokyo, Japan, 3 December 2021.

[2] Okayama university. The final report: a survey of adverse reaction of the mRNA-1273 SARS-CoV-2 Vaccine (in Japanese). Available online: [https://www.okayama-u.ac.jp/up\\_load\\_files/press\\_r3/press20210915.pdf](https://www.okayama-u.ac.jp/up_load_files/press_r3/press20210915.pdf) (accessed on 27 June 2022).

[3] McDonald I, Murray SM, Reynolds CJ, Altmann DM, Boyton RJ. Comparative systematic review and meta-analysis of reactogenicity, immunogenicity and efficacy of vaccines against SARS-CoV-2. *Npj Vaccines* **2021**, 6, <https://doi.org/10.1038/s41541-021-00336-1>.

|          |                     | First dose                   |                             |                           |                                      | Second dose                  |                             |                           |                                      |
|----------|---------------------|------------------------------|-----------------------------|---------------------------|--------------------------------------|------------------------------|-----------------------------|---------------------------|--------------------------------------|
|          |                     | Present<br>survey<br>(max) * | Juntendo<br>[1]<br>N=12,578 | Okayama<br>[2]<br>N=3,917 | Meta-analysis<br>[3]<br>(min, max) † | Present<br>survey<br>(max) * | Juntendo<br>[1]<br>N=11,791 | Okayama<br>[2]<br>N=3,288 | Meta-analysis<br>[3]<br>(min, max) † |
| Local    | Injection-site pain | 87.6%                        | 84.6%                       | 91.4 %                    | 62.5%, 86.7%                         | 86.0%                        | 84.2%                       | 90.0%                     | 75.0%, 91.7%                         |
|          | Localized warmth    | 20.8%                        | 10.9%                       |                           |                                      | 49.2%                        | 32.1%                       |                           |                                      |
|          | Exanthema           | 0.7%                         |                             |                           |                                      | 2.0%                         |                             |                           |                                      |
|          | Erythema            | 5.6%                         | 9.8%                        | 19.7%                     |                                      | 14.5%                        | 25.7%                       | 40.6%                     |                                      |
|          | Swelling            | 17.8%                        | 10.3%                       | 40.1%                     | 4%, 10.7%                            | 19.6%                        | 20.1%                       | 55.3%                     | 8.5%, 12.2%                          |
|          | Itchiness           | 7.7%                         | 5.2%                        | 17.5%                     |                                      | 20.3%                        | 13.9%                       | 31.5%                     |                                      |
|          | Red eye             | 0.4%                         |                             |                           |                                      | 0.6%                         |                             |                           |                                      |
| Systemic | Malaise             | 38.2%                        | 25.7%                       |                           |                                      | 74.9%                        | 80.4%                       |                           |                                      |
|          | Fever               | 30.9%                        | 7.1%                        | 23.2%                     | 0%, 0.8%                             | 87.7%                        | 77.0%                       | 88.0%                     | 7.5%, 32.0%                          |
|          | Fatigue             | 17.8%                        |                             | 48.4%                     | 24.5%, 37.2%                         | 32.4%                        |                             | 84.2%                     | 50%, 65.3%                           |
|          | Myalgia             | 22.8%                        |                             | 59.3%                     | 12.5%, 22.7%                         | 38.5%                        | 1.7%                        | 64.4%                     | 47.5%, 58%                           |
|          | Arthralgia          | 11.2%                        |                             | 15.9%                     | 6.7%, 16.6%                          | 44.7%                        | 6.1%                        | 50.2%                     | 12.5%, 42.8%                         |
|          | Nausea/Vomiting     | 3.5%                         |                             | 5.0%                      | 0%, 8.3%                             | 6.7%                         |                             | 12.7%                     | 17%, 24.0%                           |
|          | Diarrhea            | 3.9%                         |                             | 4.4%                      |                                      | 1.7%                         |                             | 8.4%                      |                                      |
|          | Chills              | 10.0%                        |                             | 12.6%                     | 6%, 8.3%                             | 33.5%                        | 5.5%                        | 63.0%                     | 32%, 59.3%                           |
|          | Headache            | 23.9%                        | 16.4%                       | 29.6%                     | 12.5%, 32.7%                         | 54.2%                        | 64.1%                       | 74.7%                     | 40%, 60.7%                           |
|          | Rash                | 0.4%                         |                             | 2.4%                      |                                      | 1.7%                         |                             | 5.7%                      |                                      |
